# Supplementary material for: Sorbitol reduction via govorestat ameliorates synaptic dysfunction and neurodegeneration in sorbitol dehydrogenase deficiency
Source: JCI journal article supplement (doi:10.1172/jci.insight.164954), 2023-04-04
Supplement: sd1 [file 1]

# **Sorbitol reduction via govorestat ameliorates synaptic dysfunction and neurodegeneration in sorbitol dehydrogenase deficiency**

Yi Zhu<sup>1\*</sup>, Amanda G. Lobato<sup>1,2\*</sup>, Adriana P. Rebelo<sup>3</sup>, Tijana Canic<sup>4</sup>, Natalie Ortiz-Vega<sup>1,5</sup>, Xianzun Tao<sup>1</sup>, Sheyum Syed<sup>4</sup>, Christopher Yanick<sup>6,7</sup>, Mario Saporta<sup>6</sup>, Michael Shy<sup>8</sup>, Riccardo Perfetti<sup>9</sup>, Shoshana Shendelman<sup>9</sup>, Stephan Züchner<sup>3</sup>, R. Grace Zhai<sup>1#</sup>

<sup>1</sup>Department of Molecular and Cellular Pharmacology, University of Miami Miller School of Medicine, Miami, FL, USA

<sup>2</sup>Graduate Program in Human Genetics and Genomics, University of Miami Miller School of Medicine, Miami, FL, USA

<sup>3</sup>Dr. John T. Macdonald Foundation Department of Human Genetics and John P. Hussman Institute for Human Genomics, University of Miami Miller School of Medicine, Miami, FL, USA

<sup>4</sup>Department of Physics, University of Miami, Coral Gables, FL, USA

<sup>5</sup>Graduate Program in Cellular and Molecular Pharmacology, University of Miami Miller School of Medicine, Miami, FL

<sup>6</sup>Department of Neurology, University of Miami Miller School of Medicine, Miami, FL, USA

<sup>7</sup>Graduate Program in Neuroscience, University of Miami Miller School of Medicine, Miami, FL, USA

<sup>8</sup>Department of Neurology, Carver College of Medicine, University of Iowa, Iowa City, Iowa, USA

<sup>9</sup>Rsch & Development, Applied Therapeutics, New York, NY, USA

\*Co-first authors

#Correspondence: gzhai@med.miami.edu

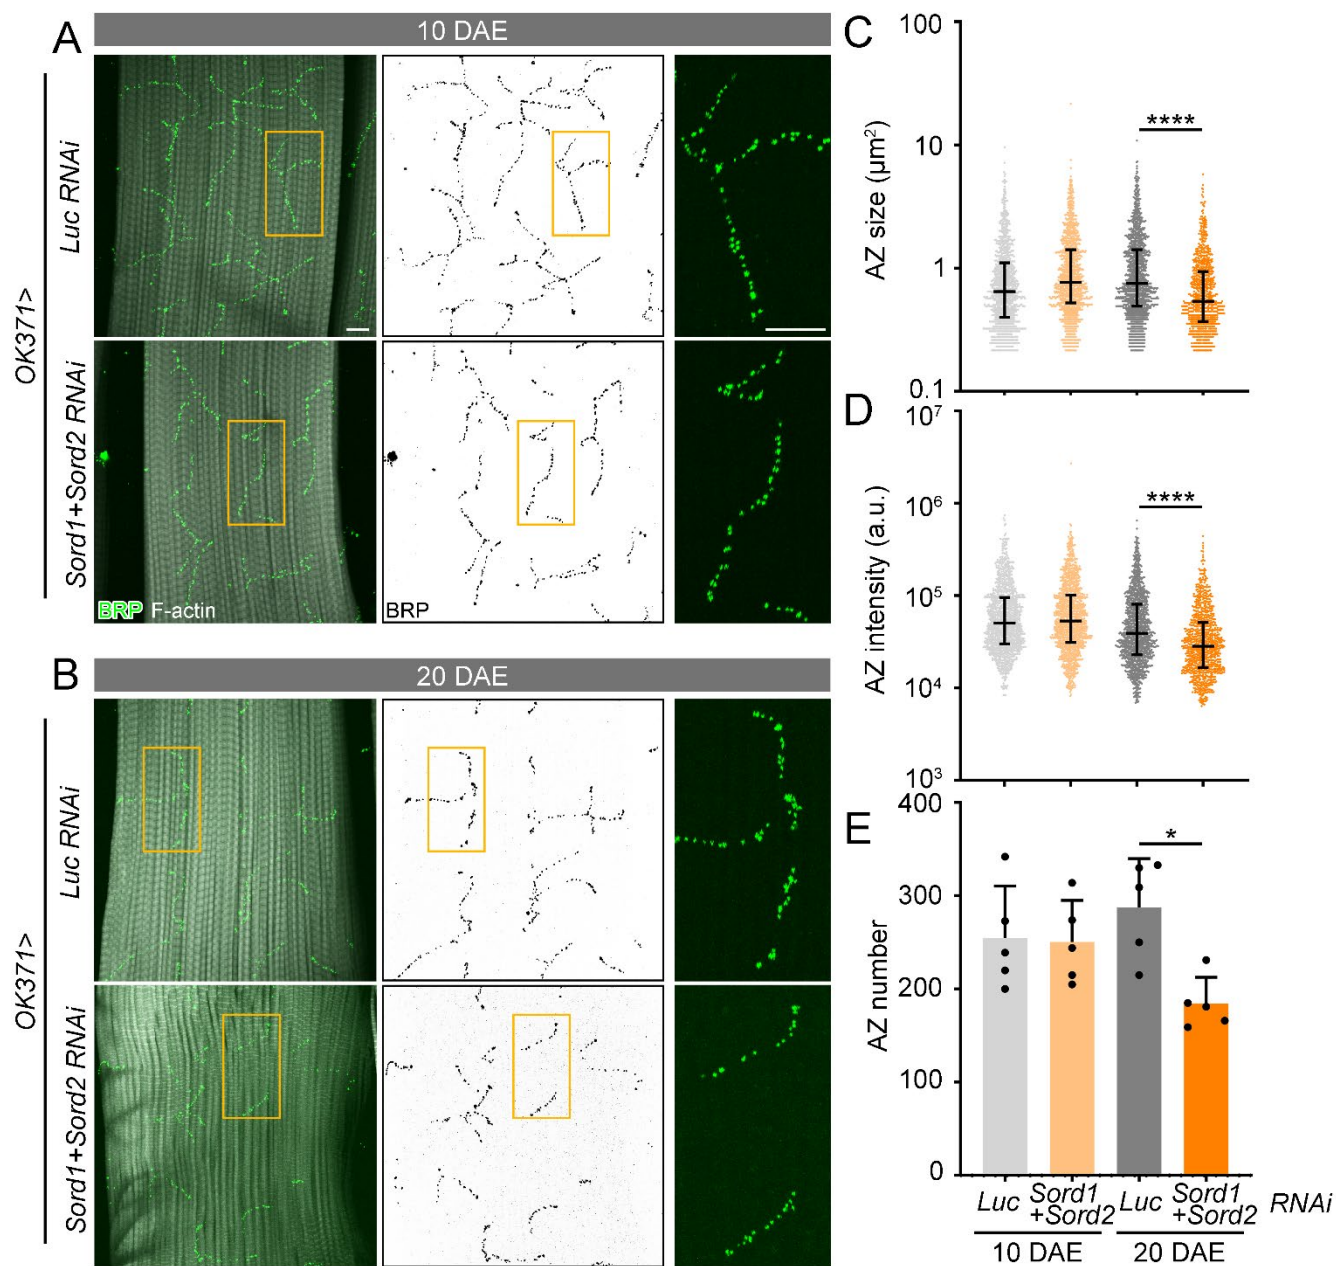

**Supplementary Figure S1.** Motor neuron-specific knockdown of Sord1 and Sord2 leads to AZ structural abnormalities in the flight muscle NMJs. **(A, B)** Flight muscles of flies with motor neuron-specific knockdown of luciferase (control) or Sord1+Sord2 were dissected at 10 and 20 DAE and stained with BRP, HRP, and phalloidin (F-actin). Boxed areas are shown in higher magnification. Scale bars: 10  $\mu\text{m}$ . **(C-E)** Quantification of AZ size, intensity, and number in flight muscle NMJs. Data are presented as median  $\pm$  interquartile range (**C**, **D**) and mean  $\pm$  SD (**E**). \* $p < 0.05$ , \*\*\*\* $p < 0.0001$ .  $n=5$ . Student's t-test was performed for statistical analysis.

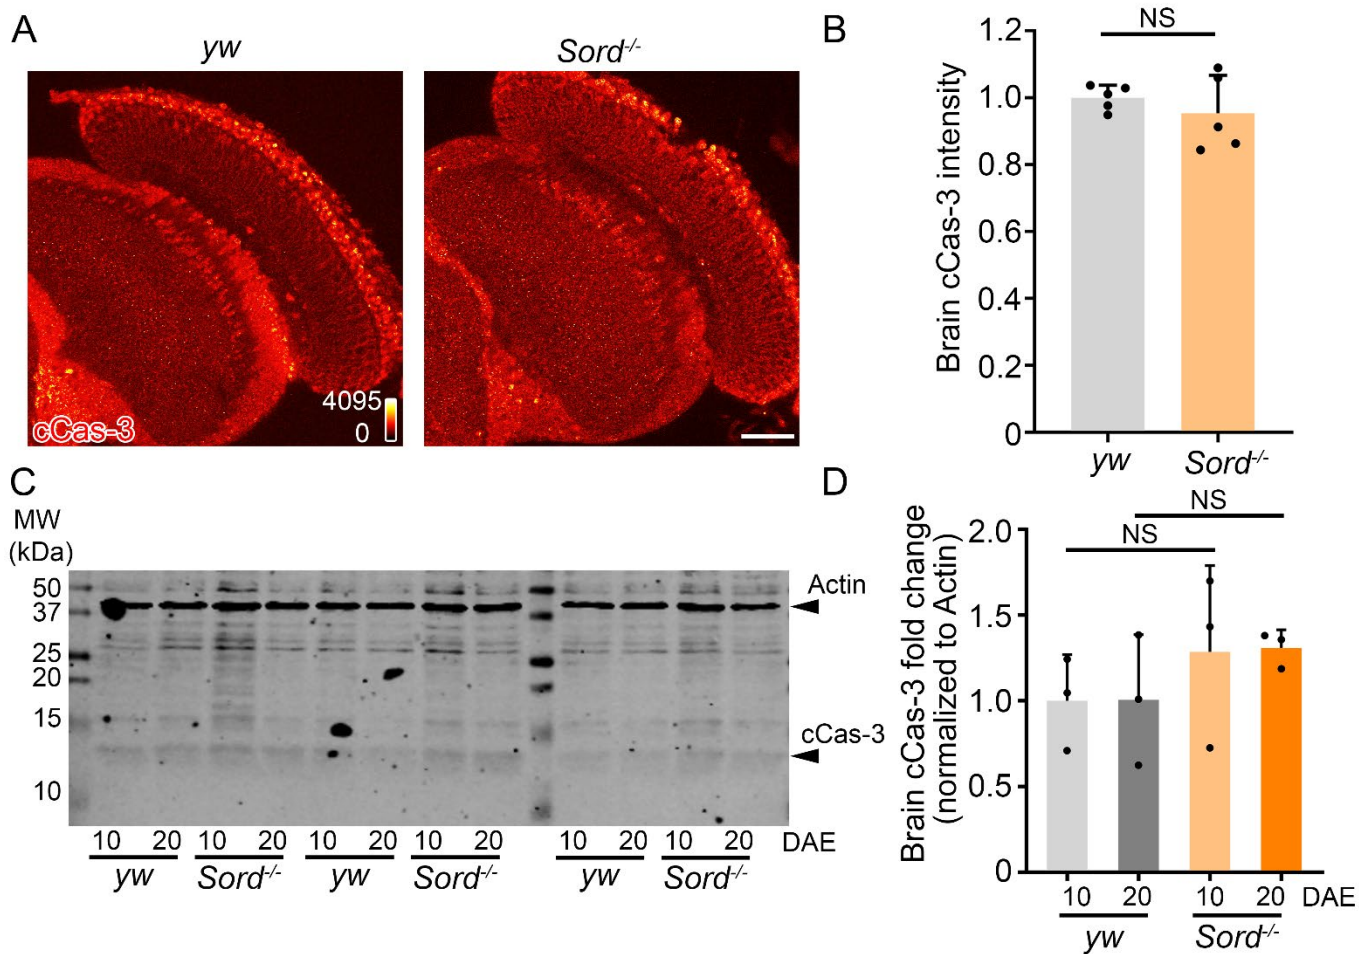

**Supplementary Figure S2.** Cleaved caspase-3 (cCas-3) in the brain shows no difference between *yw* and *Sord*-deficient flies. **(A)** 10 DAE *yw* (control) and *Sord*-deficient flies were dissected and stained for cCas-3. Scale bar: 30 $\mu$ m. **(B)** Quantification of cCas-3 in the brain.  $n = 4$  per genotype. Data are presented as mean  $\pm$  SD. **(C)** Western blot analysis of cCas-3 staining for *yw* (control) and *Sord*-deficient fly heads at 10 and 20 DAE  $n = 3$ . Actin is used as a loading control. **(D)** Quantification of cCas-3 staining normalized to Actin. Student's t-test was performed for statistical analysis. NS: not significant.

## Supplementary Methods:

**Western blot analysis.** For analyzing cCas-3 expression (Supplemental Figure 2C), 10 heads of each genotype were homogenized using RIPA (radioimmunoprecipitation assay) buffer. Extracted samples were mixed with Laemmli sample buffer (2% SDS, 10% glycerol, 62.5mM Tri-HCl, 0.001% bromophenol blue, and 5%  $\beta$ -mercaptoethanol) and denatured at 95°C for 10 minutes. Proteins were separated by SDS-PAGE (sodium dodecyl sulfate-polyacrylamide gel electrophoresis) and transferred to a nitrocellulose membrane. After blocking at RT for 1 hour, the membrane was incubated with primary antibody at 4°C overnight, followed by secondary antibody incubation for 1 hour at RT. The membrane was scanned by an Odyssey Infrared Imaging system (LI-COR Biosciences) and images were analyzed using Image Studio (version 4.0). The primary antibody dilution for anti-cCas-3 was 1:1000 (Cell Signaling Ca# 9661), and  $\beta$ -actin was 1:5,000 (Sigma-Aldrich Ca# A1978). The secondary antibody dilution for DyLight 680 conjugated anti-Rabbit IgG was 1:10,000 (Rockland Ca# 611-144-002), and DyLight 800 conjugated anti-Mouse IgG was 1:10,000 (Rockland Ca# 610-145-002).
